# Supplementary material
Source: publisher site journal article supplement (https://www.dovepress.com/article/453100)

**Supplementary Figure**

**Figure S1. PPI network of DEGs.** The PPI network was constructed using Cytoscape. Red dots represent upregulated genes and blue dots represent downregulated genes.


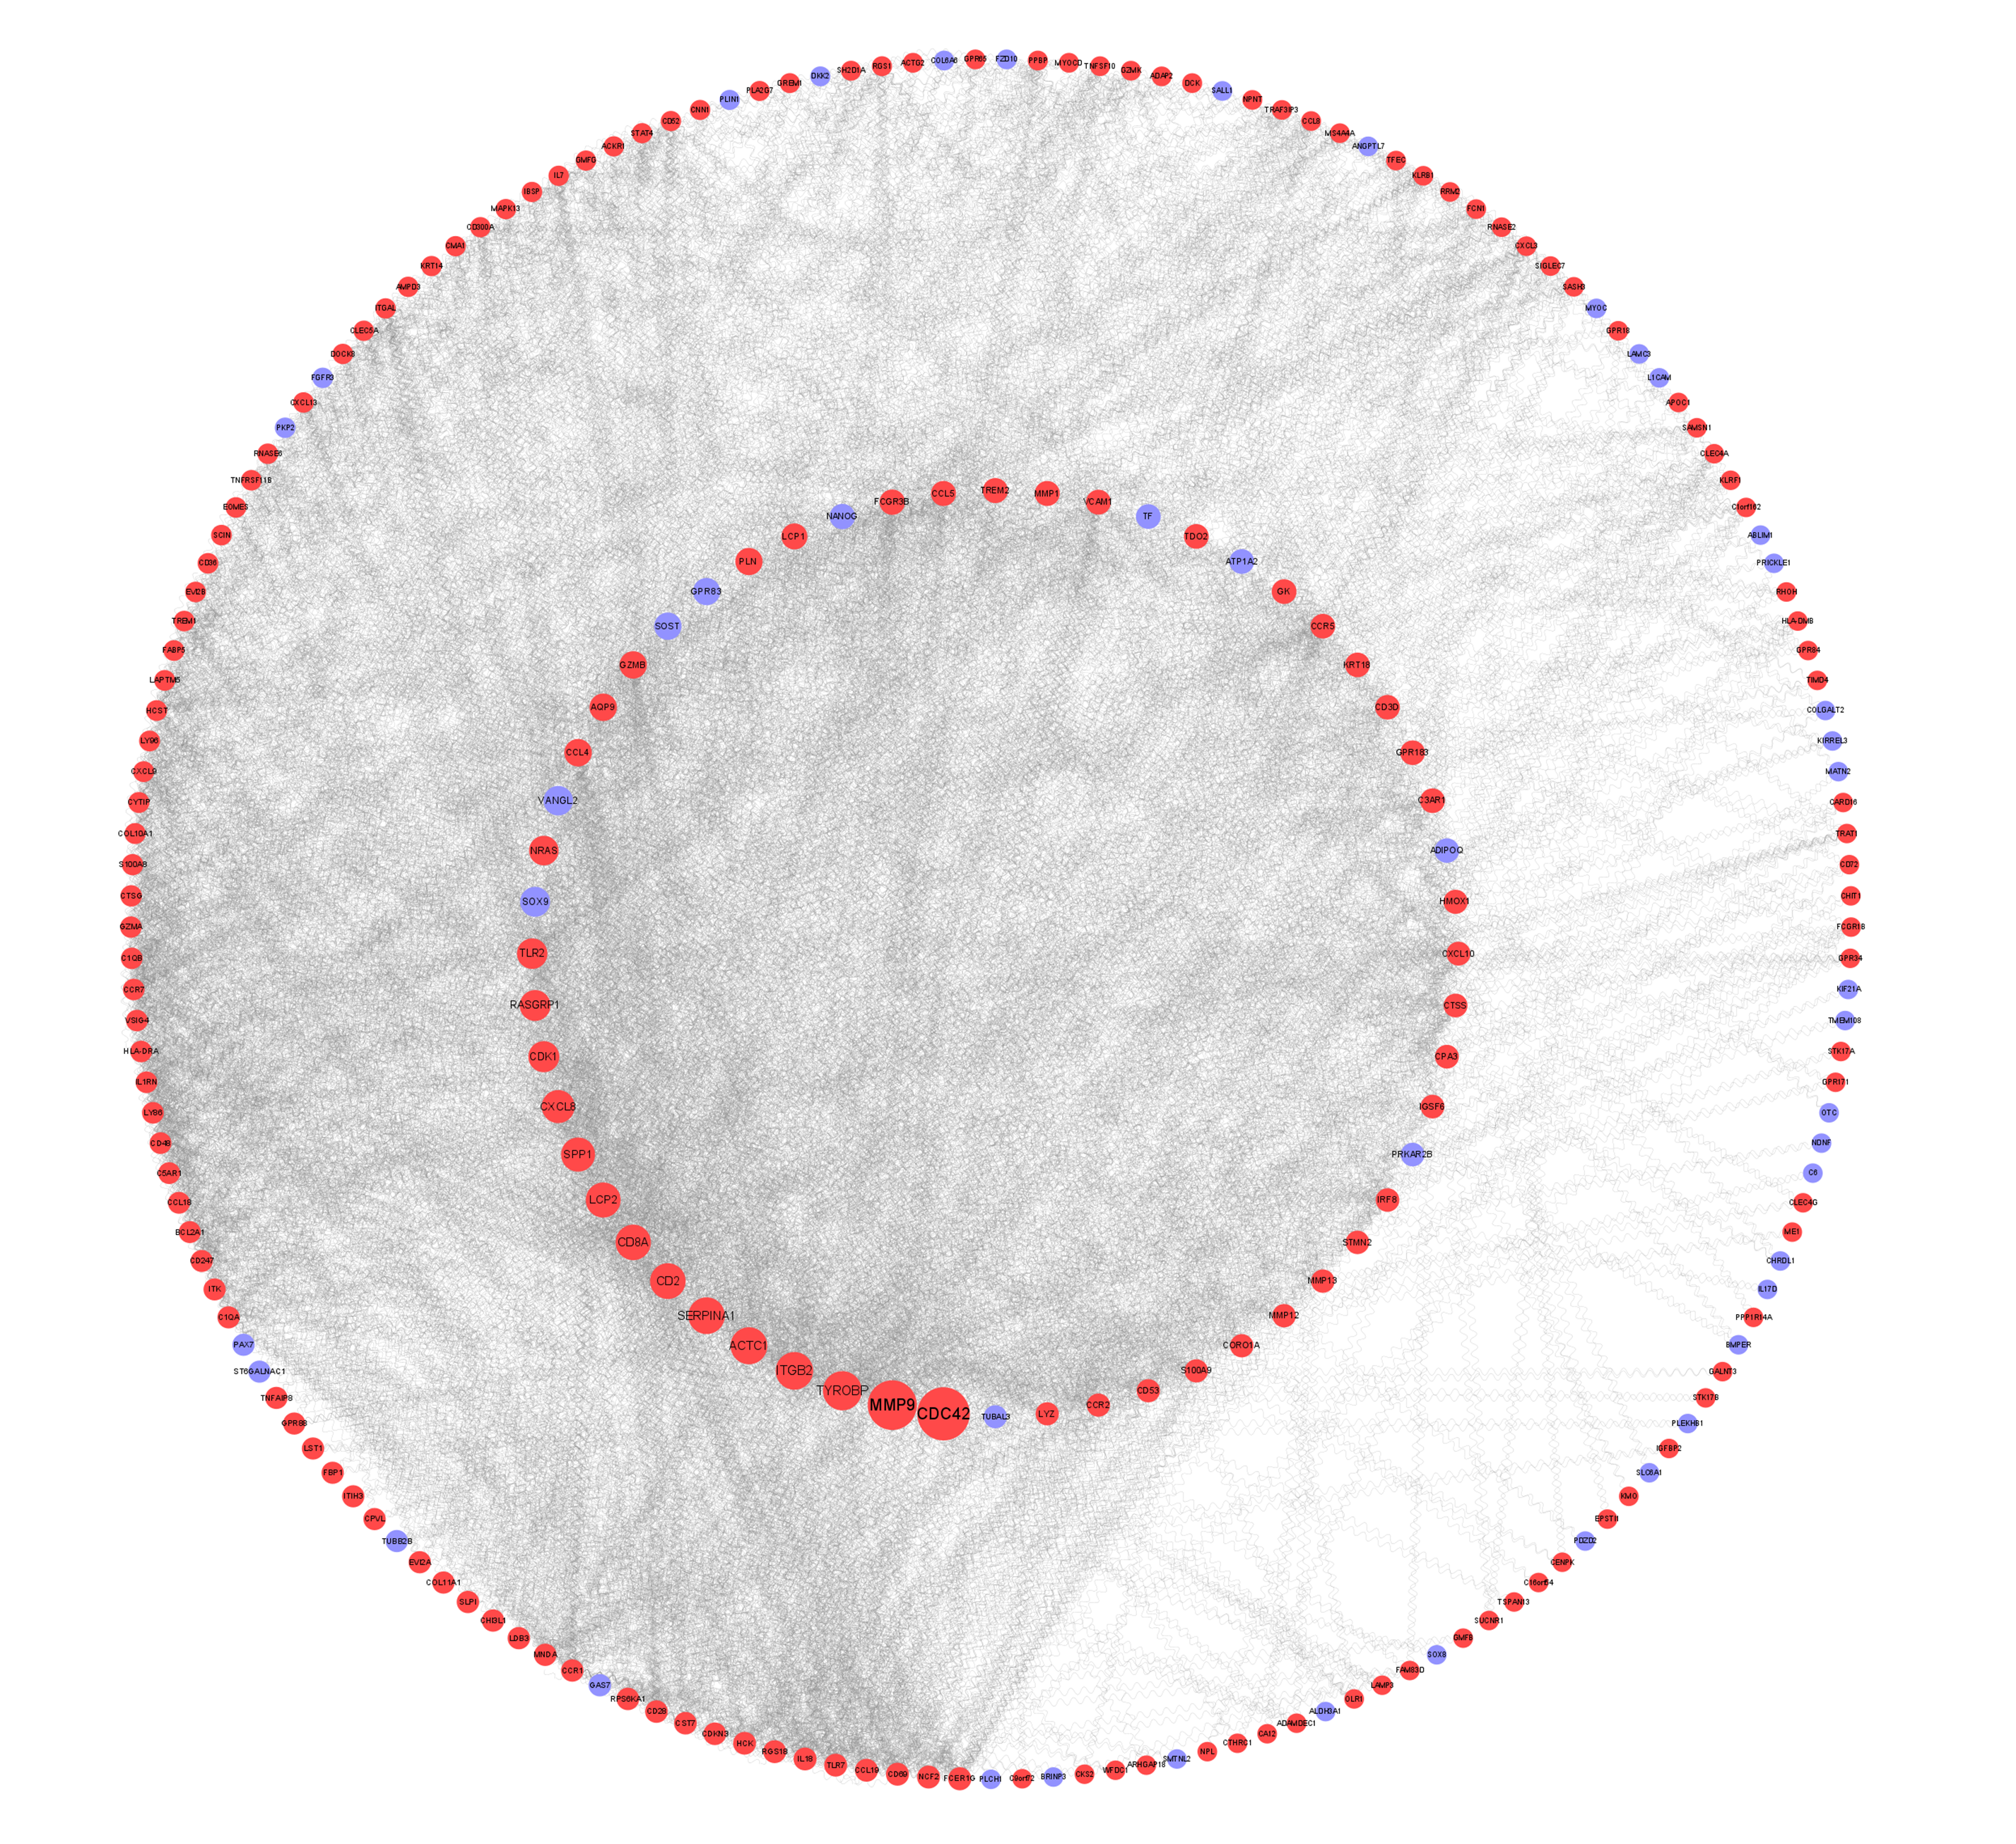

Supplement: Supplementary file 1 [file get_supplementary_file.php]
